# Supplementary material for: Newspaper coverage of biobanks
Source: PeerJ. 2014 Jul 31;2:e500. doi: 10.7717/peerj.500 (PMC4121587; doi:10.7717/peerj.500)
Supplement: Supplemental Information 2 [file peerj-02-500-s002.xlsx]

## Sheet: Coding Results File
Newspaper_country	Newspaper	Year	Section	Type	Author	Specific_biobank	Biobank_name	Biobank_location	Primary_material	Primary_mat_multi1	Primary_mat_multi2	Primary_mat_multi3	Funding	Funding_sourcespecify	Funding_multi1	Funding_multi2	Funding_multi3	Patientdonor	Conditiondisease	Quote_patientdonor	Quote_researcher	Quote_clinician	Quote_public	Quote_biobank	Quote_funding	Quote_industry	Benefits	Benefit_framing	Main_benefit	Mention_health_benefits	Mention_discrimination_insurance	Mention_discrimination_other	Risks	Risks_framing	Main_risk	Tone	Why_positive	Why_negative	Legalpolicyregulatory
2	10	2013	1	2	1	1	1	1	5	99	99	99	4	1	99	99	99	1	1	1	2	1	1	1	1	1	1	6	1	1	1	1	2	2	2	1	6	6	1
2	10	2013	3	1	1	1	1	1	5	99	99	99	4	1	99	99	99	1	1	1	1	1	1	1	1	1	2	2	2	1	1	1	1	6	1	1	6	6	2
4	14	2013	1	1	1	1	1	1	8	99	99	99	4	1	99	99	99	1	3	1	2	1	1	1	1	1	2	2	2	1	1	1	1	6	1	1	6	6	1
1	4	2013	1	2	1	2	2	2	7	1	9	10	4	1	99	99	99	1	2	1	2	1	1	2	1	1	2	2	2	2	1	1	1	6	1	2	2	6	1
3	8	2012	4	5	2	1	1	1	5	99	99	99	2	1	99	99	99	1	1	1	1	1	1	1	1	1	1	6	1	1	1	1	2	2	3	3	6	2	1
2	12	2012	5	2	1	2	3	6	5	99	99	99	3	2	22	23	99	1	2	1	2	1	1	2	1	1	2	2	2	1	1	1	1	6	1	2	2	6	1
3	8	2012	4	4	6	2	4	4	5	99	99	99	4	1	99	99	99	1	1	1	1	1	1	1	1	1	2	2	2	1	1	1	2	2	2	2	2	6	1
3	8	2012	4	4	6	2	4	4	5	99	99	99	4	1	99	99	99	1	1	1	1	1	1	1	1	1	1	6	1	1	1	1	2	2	2	1	6	6	1
4	15	2012	1	1	1	2	5	5	7	1	2	99	4	1	99	99	99	1	3	1	1	1	1	2	1	1	2	2	2	2	1	1	1	6	1	1	6	6	1
1	5	2012	4	2	2	2	6	2	7	1	11	99	2	3	99	99	99	2	3	2	1	1	1	2	1	1	2	2	2	2	1	1	1	6	1	2	2	6	1
1	1	2012	4	5	2	1	1	1	7	1	9	99	2	4	99	99	99	2	3	2	1	1	1	1	1	1	2	2	2	1	1	1	1	6	1	1	6	6	1
3	8	2012	5	1	1	2	4	4	7	1	9	10	4	1	99	99	99	1	2	1	1	1	2	2	1	1	2	2	2	1	1	1	1	6	1	2	2	6	1
3	7	2012	1	1	4	2	4	4	7	1	9	10	3	2	24	25	99	1	1	1	1	1	1	1	1	1	2	2	2	1	1	1	1	6	1	2	2	6	1
4	16	2012	1	1	2	1	1	1	8	99	99	99	1	1	99	99	99	1	2	1	1	1	1	1	1	1	2	2	1	1	1	1	1	6	1	1	6	6	1
1	1	2011	4	2	4	2	7	6	2	99	99	99	4	1	99	99	99	1	3	1	2	1	1	1	1	1	2	3	3	1	1	1	1	6	1	1	6	6	1
3	6	2011	4	4	6	2	4	4	8	99	99	99	3	1	99	99	99	1	1	1	1	1	1	1	1	1	2	2	2	1	1	1	1	6	1	2	1	6	2
1	4	2011	1	2	1	1	1	1	8	99	99	99	4	1	99	99	99	1	2	1	2	1	1	1	1	1	2	1	2	1	2	2	2	4	4	1	6	6	1
1	2	2011	5	2	2	2	8	2	2	99	99	99	3	2	26	27	28	1	3	1	2	1	1	2	1	1	2	1	2	1	1	1	1	6	1	2	1	6	1
1	1	2010	2	1	2	2	9	6	1	99	99	99	4	1	99	99	99	1	4	1	1	1	1	1	1	1	2	2	2	1	1	1	1	6	1	1	6	6	1
3	7	2010	1	1	1	2	10	6	8	99	99	99	1	3	29	30	31	1	1	1	2	1	1	2	1	1	2	2	2	1	1	1	1	6	1	1	6	6	1
2	12	2010	1	1	1	2	11	3	5	99	99	99	3	2	5	32	33	1	2	2	2	1	1	2	1	1	2	1	5	2	1	1	1	6	1	2	1	6	2
2	10	2010	3	2	1	2	11	3	7	1	5	99	1	5	99	99	99	1	1	2	2	1	1	1	1	1	2	2	2	1	1	1	2	2	5	1	6	6	2
1	4	2010	1	1	1	2	2	2	7	1	9	99	4	1	99	99	99	1	3	1	1	1	1	2	1	1	2	2	2	1	1	1	1	6	1	2	2	6	1
3	7	2009	5	3	1	2	4	4	7	1	9	10	4	1	99	99	99	2	1	1	1	1	1	1	1	1	2	2	2	1	1	1	1	6	1	1	6	6	1
3	8	2009	4	1	1	2	12	6	5	99	99	99	4	1	99	99	99	1	2	1	2	1	1	1	1	1	1	6	1	1	1	1	2	3	6	1	6	6	2
3	7	2009	1	1	5	1	1	1	8	99	99	99	4	1	99	99	99	1	1	1	1	1	1	1	1	1	2	2	2	1	1	1	1	6	1	1	6	6	2
1	4	2009	1	1	1	2	2	2	7	1	9	99	1	2	34	35	99	1	1	1	1	1	1	2	1	1	2	2	2	1	1	1	2	2	2	1	6	6	2
3	9	2009	4	1	2	1	1	1	2	99	99	99	2	6	99	99	99	1	3	1	1	1	1	1	1	1	2	3	6	1	1	1	1	6	1	2	3	6	1
3	7	2009	5	3	2	2	4	4	7	1	9	99	1	2	9	11	7	1	1	1	1	1	1	1	1	1	2	2	2	1	1	1	2	4	4	3	6	4	1
3	8	2009	1	1	1	1	1	1	12	99	99	99	4	1	99	99	99	1	5	1	1	1	1	1	1	1	2	2	2	1	1	1	1	6	1	1	6	6	1
3	8	2008	1	1	1	2	4	4	7	1	9	99	1	7	99	99	99	1	1	1	1	1	2	2	1	1	2	2	2	1	1	1	2	2	2	3	6	2	2
1	4	2008	1	1	5	1	1	1	7	1	9	2	4	8	99	99	99	1	3	1	2	1	1	1	1	1	2	2	2	1	1	1	1	6	1	2	2	6	1
3	9	2008	5	3	1	2	32	4	5	99	99	99	4	1	99	99	99	1	3	1	1	1	1	1	1	1	2	2	2	1	1	1	2	2	2	1	6	6	2
3	7	2008	5	1	2	1	1	1	7	5	2	99	4	1	99	99	99	1	1	1	1	1	1	1	1	1	2	4	2	1	1	1	1	6	1	1	6	6	2
1	4	2008	5	3	5	2	2	2	8	99	99	99	2	2	34	35	99	1	1	1	1	1	1	2	1	1	2	2	2	1	1	2	2	2	7	2	2	6	1
1	5	2007	5	3	3	2	32	6	7	1	2	4	4	1	99	99	99	1	1	1	1	1	1	1	1	1	2	2	2	1	2	1	2	2	8	1	6	6	2
3	9	2007	5	1	1	2	4	4	5	99	99	99	4	1	99	99	99	1	1	1	1	1	1	1	1	1	2	2	2	1	2	2	2	2	2	1	6	6	2
3	8	2007	1	1	1	2	13	6	12	99	99	99	4	1	99	99	99	1	5	1	2	1	1	1	1	1	1	6	1	1	1	1	1	6	1	1	6	6	1
3	7	2007	4	4	6	2	4	4	8	99	99	99	4	1	99	99	99	1	1	1	1	1	1	1	1	1	2	2	2	1	1	1	2	4	4	2	2	6	1
3	7	2007	1	1	2	2	4	4	7	1	9	99	1	2	9	11	41	1	2	1	1	1	1	2	1	1	2	2	2	1	2	2	2	2	9	1	6	6	1
4	16	2007	5	1	2	1	1	1	2	99	99	99	4	1	99	99	99	1	1	1	1	1	1	1	1	1	1	6	1	1	1	1	1	6	1	1	6	6	1
3	9	2007	1	1	1	2	4	4	7	1	9	99	1	2	9	11	41	1	2	2	2	1	1	1	1	1	2	2	2	1	1	1	1	6	1	2	2	6	1
3	9	2007	1	3	1	2	4	4	8	99	99	99	1	9	99	99	99	1	1	1	1	1	1	1	1	1	2	2	2	1	2	2	2	1	2	2	2	6	2
3	8	2007	5	1	1	2	4	4	5	99	99	99	4	1	99	99	99	1	2	1	2	1	1	1	2	1	2	2	2	1	1	1	1	6	1	2	2	6	1
3	9	2007	1	1	5	2	4	4	7	1	9	99	1	2	9	11	41	1	2	1	1	1	1	2	1	1	2	2	2	1	1	1	1	6	1	1	6	6	1
1	4	2007	1	1	1	2	2	2	5	99	99	99	3	2	34	35	41	1	1	1	2	1	1	2	1	1	2	2	2	1	1	1	1	6	1	2	2	6	2
3	7	2007	5	1	5	2	4	4	8	99	99	99	4	1	99	99	99	1	1	1	1	1	1	1	1	1	2	3	8	1	1	1	1	6	1	1	6	6	1
3	7	2007	1	1	2	2	4	4	7	1	9	99	4	1	99	99	99	1	2	1	1	1	1	2	1	1	2	2	2	1	1	1	2	4	10	1	6	6	1
2	12	2007	5	1	1	2	14	3	7	1	10	99	4	10	99	99	99	1	1	1	2	1	2	2	1	1	2	2	2	1	1	1	1	6	1	2	2	6	1
3	9	2006	5	1	1	2	4	4	8	99	99	99	4	1	99	99	99	1	1	1	1	1	1	1	1	1	1	6	1	1	1	1	2	4	4	1	6	6	1
3	8	2006	1	1	1	2	4	4	7	1	9	99	1	11	99	99	99	1	1	1	1	1	1	2	2	1	2	2	2	1	1	1	2	2	11	1	6	6	1
3	7	2006	1	1	1	2	4	4	7	1	9	99	1	2	9	24	99	1	1	1	1	1	1	1	2	1	2	2	2	1	1	1	2	4	4	1	6	6	2
3	8	2013	4	3	2	2	15	4	2	99	99	99	4	1	99	99	99	2	6	1	1	1	2	2	1	1	2	2	2	1	1	1	1	6	1	2	2	6	2
3	8	2013	1	1	2	2	16	4	2	99	99	99	4	1	99	99	99	1	5	2	1	1	1	2	1	1	2	2	2	1	1	1	1	6	1	2	2	6	1
2	10	2012	4	3	3	1	1	1	2	99	99	99	4	12	99	99	99	2	3	1	1	1	1	1	1	1	1	6	1	1	1	1	1	6	1	1	6	6	1
1	1	2012	5	2	1	2	17	2	5	99	99	99	2	13	99	99	99	2	1	2	2	1	2	2	2	1	2	2	2	1	2	2	2	2	2	1	6	6	2
4	15	2012	1	1	1	2	18	5	1	99	99	99	2	14	99	99	99	1	7	1	2	1	1	2	1	1	2	1	2	2	1	1	2	3	12	2	1	6	1
3	7	2012	4	1	1	1	1	1	3	99	99	99	1	1	99	99	99	1	2	1	1	1	1	1	1	1	2	1	2	1	1	1	1	6	1	1	6	6	1
1	3	2012	1	2	2	2	31	2	2	99	99	99	4	1	99	99	99	2	2	2	2	1	1	2	1	1	2	2	2	1	1	1	1	6	1	2	2	6	1
2	12	2012	5	2	2	1	1	1	2	99	99	99	1	11	99	99	99	1	9	1	2	1	1	2	1	1	2	2	2	1	1	1	1	6	1	2	2	6	1
3	9	2012	4	4	4	1	1	1	2	99	99	99	4	1	99	99	99	1	1	1	1	1	1	1	1	1	1	6	1	1	1	1	1	6	1	1	6	6	2
4	14	2012	5	2	4	2	19	5	2	99	99	99	3	15	99	99	99	1	2	1	1	1	1	2	1	1	1	6	1	1	1	1	1	6	1	1	6	6	2
2	10	2012	3	1	1	2	20	3	2	99	99	99	4	1	99	99	99	2	5	2	2	1	1	2	1	1	2	2	2	1	1	1	1	6	1	2	2	6	1
2	12	2012	1	1	2	2	20	3	2	99	99	99	4	1	99	99	99	1	5	1	1	1	1	2	1	1	2	2	2	1	1	1	1	6	1	1	6	6	1
3	8	2012	4	3	2	2	15	4	2	99	99	99	1	11	99	99	99	2	2	1	1	1	1	1	1	1	2	2	2	1	1	1	1	6	1	2	2	6	2
3	9	2011	1	1	1	2	21	4	3	99	99	99	4	16	99	99	99	1	2	1	2	1	1	1	1	1	2	1	2	1	1	1	2	4	13	2	1	6	2
1	4	2011	1	1	2	2	21	4	3	99	99	99	1	1	99	99	99	1	2	1	2	1	1	1	1	1	2	1	2	1	1	1	1	6	1	1	6	6	1
3	7	2011	5	2	2	2	32	6	2	99	99	99	4	1	99	99	99	1	1	1	2	1	1	2	1	1	2	2	2	1	1	1	1	6	1	2	2	6	1
1	3	2011	5	2	2	2	22	3	2	99	99	99	1	17	99	99	99	1	2	1	2	1	1	2	1	1	2	2	2	1	1	1	1	6	1	2	2	6	1
4	14	2011	4	1	5	2	23	5	2	99	99	99	4	1	99	99	99	1	3	1	1	1	1	2	1	1	2	2	2	1	1	1	1	6	1	2	2	6	1
3	9	2011	1	1	2	1	1	1	2	99	99	99	4	1	99	99	99	1	10	1	2	1	1	1	1	1	2	2	2	1	1	1	1	6	1	2	2	6	2
4	16	2011	1	1	1	2	24	5	2	99	99	99	1	18	99	99	99	1	3	1	2	1	1	1	1	1	2	2	2	1	1	1	1	6	1	2	2	6	1
3	8	2011	4	2	2	2	25	3	2	99	99	99	2	19	99	99	99	2	11	2	2	1	1	2	1	1	2	2	2	1	1	1	1	6	1	2	2	6	1
2	10	2011	4	1	2	2	25	3	2	99	99	99	3	19	99	99	99	2	11	2	2	1	1	2	2	1	2	2	2	1	1	1	1	6	1	2	2	6	1
3	9	2011	4	2	2	2	26	4	2	99	99	99	2	2	36	37	38	1	3	2	2	1	1	2	1	1	2	2	2	1	1	1	1	6	1	2	2	6	2
1	5	2011	4	2	1	2	27	2	2	99	99	99	4	1	99	99	99	1	2	1	2	1	1	2	1	1	2	2	2	1	1	1	1	6	1	2	2	6	2
1	4	2011	5	2	1	2	27	2	2	99	99	99	1	20	99	99	99	1	2	1	1	1	1	2	1	1	2	2	2	1	1	1	1	6	1	2	2	6	1
2	10	2010	5	1	1	2	28	3	5	99	99	99	4	1	99	99	99	1	12	1	2	1	1	1	1	1	2	2	2	1	1	1	1	6	1	1	6	6	1
2	10	2009	3	2	2	2	25	3	2	99	99	99	4	2	39	40	99	2	13	2	2	1	2	2	1	1	2	2	2	1	1	1	1	6	1	2	2	6	1
4	15	2009	1	1	1	2	29	5	3	99	99	99	4	1	99	99	99	1	1	1	1	1	1	1	1	1	1	6	1	1	1	1	2	2	14	1	6	6	1
3	9	2008	5	2	5	2	30	4	2	99	99	99	2	21	99	99	99	1	14	2	2	1	1	2	1	1	2	2	2	1	1	1	1	6	1	2	2	6	1
2	12	2006	5	2	1	2	33	3	7	1	2		2	42				2	2	2	2	1	1	2	1	1	2	2	2	1	1	1	1	6	1	2	2	6	2
3	9	2006	4	1	2	2	4	4	8				2	9				1	2	1	1	1	1	1	2	1	1	6	1	1	1	1	1	6	1	1	6	6	1
2	12	2006	5	2	1	2	4	4	7	1	5		4	1				1	2	1	2	1	1	2	1	1	2	2	2	1	1	1	2	2	2	1	6	6	2
3	8	2006	5	5	1	2	4	4	7	1	6	9	3	2	9	11		1	2	1	2	1	2	2	1	1	2	2	2	1	1	1	2	4	15	2	2	6	1
2	10	2006	4	2	6	1	1	1	7	1	2	4	4	1				2	2	2	2	2	1	1	1	1	2	2	2	1	1	1	2	5	16	1	6	6	2
3	6	2006	3	1	1	2	4	4	7	1	6	9	4	1				1	1	1	2	1	1	1	1	1	2	1	12	1	1	1	2	4	17	3	6	4	1
3	6	2006	4	4	6	2	4	4	7	1	6	9	4	1				1	1	1	1	1	1	1	1	1	2	2	2	1	1	1	1	6	1	2	2	6	1
3	9	2006	1	1	5	2	4	4	5				4	1				1	1	1	1	1	1	2	1	1	2	2	2	1	1	1	1	6	1	1	6	6	1
3	8	2006	5	1	1	2	4	4	8				4	1				1	2	1	2	1	2	2	1	1	2	2	2	1	1	1	2	4	15	2	2	6	1
3	7	2006	1	1	1	2	4	4	7	1	6	9	3	2	9			1	1	1	1	1	1	1	1	1	2	2	2	1	1	1	1	6	1	1	6	6	1
3	6	2006	1	1	1	2	4	4	7	1	6	9	3	2	44	11	9	1	2	1	2	1	1	2	1	1	2	2	12	1	1	1	2	4	19	2	2	6	1
3	8	2006	5	5	5	2	4	4	8				3	2	44	11	9	1	3	1	1	1	1	1	1	1	1	6	1	1	1	1	1	6	1	1	6	6	1
3	8	2006	5	2	1	2	4	4	7	1	6	9	1	1				1	2	1	2	1	2	2	1	1	2	2	2	1	1	1	2	4	15	1	6	6	1
3	9	2005	4	2	1	1	1	1	8	1	5		4	1				1	5	1	1	1	1	1	1	1	2	2	2	1	1	1	1	6	1	1	6	6	1
4	16	2005	4	2	2	1	1	1	5				4	1				1	2	1	2	1	2	1	1	1	2	2	2	1	1	2	2	2	2	1	6	6	2
4	16	2005	4	1	2	1	1	1	5				4	1				1	1	1	2	1	2	1	1	1	1	6	1	1	2	2	2	2	2	3	6	2	2
1	5	2005	1	2	1	1	1	1	7	1	2	5	4	1				1	1	1	2	1	1	1	1	1	1	6	1	1	1	1	2	2	20	3	6	2	2
1	5	2005	1	2	1	2	2	2	7	1	5		1	43				1	1	1	2	1	1	1	1	1	2	2	2	1	1	2	2	2	2	3	6	2	2
1	5	2005	1	2	1	2	2	2	7	1	5		1	43				1	2	1	1	1	2	2	1	1	2	2	13	1	1	1	1	6	1	2	1	6	2
1	4	2005	1	2	1	2	2	2	7	1	5		4	1				1	2	1	2	1	2	2	1	1	2	2	2	1	1	1	2	2	2	2	2	6	2
3	8	2004	3	2	1	2	4	4	8				4	1				1	2	1	2	1	1	1	2	2	2	2	2	1	1	1	1	6	1	1	6	6	1
3	8	2004	4	5	5	2	4	4	8				3	2	44	11	9	1	2	1	1	1	1	1	1	1	1	6	1	1	1	1	1	6	1	1	6	6	1
3	8	2004	4	5	2	2	4	4	8				4	1				1	1	1	2	1	1	1	1	1	1	6	1	1	1	1	2	4	19	3	6	4	1
3	6	2004	1	1	1	2	4	4	8				3	2	44	11	9	1	2	1	2	1	1	2	1	1	2	2	2	1	1	1	2	4	19	3	6	4	1
3	6	2004	3	1	1	2	4	4	8				4	1				1	1	1	2	1	1	2	1	1	1	6	1	1	1	1	2	2	2	3	6	2	2
3	7	2004	4	3	3	2	4	4	8				4	1				1	1	1	1	1	1	1	1	1	2	2	2	1	1	1	2	2	20	3	6	2	2
2	12	2004	5	1	5	2	34	3	8				4	1				1	1	1	1	1	1	1	1	1	1	6	1	1	1	1	1	6	1	1	6	6	1
1	4	2004	4	1	5	1	1	1	5				3	2	46	45		1	1	1	1	1	2	1	1	1	2	2	2	1	1	1	1	6	1	2	2	6	1
1	4	2004	4	1	2	1	1	1	5				2	45				1	1	1	1	1	1	1	1	2	2	2	2	1	1	1	1	6	1	2	2	6	1
3	6	2003	3	3	3	2	4	4	1				1	11				1	2	1	1	1	1	1	1	1	1	6	1	1	1	1	2	4	17	3	6	4	2
3	6	2003	3	2	1	2	4	4	8				1	1				1	1	1	2	1	1	1	2	1	1	6	1	1	1	1	2	4	21	3	6	4	1
3	6	2003	5	1	1	2	4	4	1				3	2	44	11	9	1	2	1	1	1	1	2	1	1	2	2	2	1	1	1	2	2	2	2	2	6	2
3	7	2003	5	1	1	2	4	4	5				3	2	44	11	9	1	1	1	1	1	1	2	1	1	2	2	2	1	1	1	1	6	1	2	2	6	2
3	7	2003	5	5	1	2	4	4	1				4	1				1	1	1	1	1	1	2	1	1	2	2	2	1	1	1	2	2	20	2	2	6	2
3	7	2003	5	2	4	2	4	4	5				4	1				1	3	1	1	1	1	2	1	1	2	2	2	1	2	2	2	4	17	1	6	6	2
3	8	2003	4	3	4	2	4	4	8				3	2	9	11		1	1	1	1	1	1	1	1	1	1	6	1	1	1	1	2	4	19	3	6	4	1
3	8	2003	4	5	5	2	4	4	1				3	2	44	11	9	1	1	1	1	1	1	1	1	1	1	2	2	1	2	1	1	6	1	1	6	6	2
2	10	2003	4	1	1	2	35	3	7	1	6	14	3	1				1	2	1	2	2	1	2	1	2	2	2	2	1	1	2	2	2	22	2	2	6	2
3	8	2003	5	1	1	2	4	4	5				3	2	11	47		1	1	1	1	1	1	1	1	1	2	2	2	1	1	1	1	6	1	2	2	6	1
4	16	2003	5	1	5	2	4	4	5				1	11				1	2	1	1	1	2	1	1	1	2	2	2	1	1	1	2	4	21	3	6	4	1
3	8	2003	5	1	5	2	4	4	5				3	2	44	11	9	1	1	1	1	1	1	2	1	1	2	2	2	1	1	1	2	4	15	1	6	6	1
3	6	2003	1	1	1	2	4	4	5				4	1				1	1	1	1	1	2	1	1	1	2	2	2	1	1	1	2	2	2	3	6	2	2
3	9	2003	5	1	1	2	4	4	5				1	11				1	2	1	1	1	2	1	1	1	2	2	2	1	1	1	2	4	17	3	6	4	1
2	10	2002	2	2	1	2	4	4	7	1	5		3	2	9	11		1	2	1	2	1	2	1	2	1	2	2	2	1	1	2	2	2	2	1	6	6	2
3	7	2002	5	5	1	2	4	4	5				2	9				1	1	1	1	1	1	1	2	1	2	2	2	1	1	1	2	2	2	1	6	6	1
2	10	2002	3	5	1	2	12	6	8				2	1				1	2	1	2	1	1	1	1	2	2	2	2	1	1	1	2	2	2	2	2	6	2
3	8	2002	4	3	6	2	4	4	5				4	1				1	1	1	1	1	1	1	1	1	1	6	1	1	2	2	2	2	2	1	6	6	2
3	7	2002	1	1	1	2	4	4	8				3	9				1	2	1	1	1	1	1	1	1	2	2	2	1	1	1	2	2	2	1	6	6	2
3	7	2002	1	1	1	2	4	4	5				3	9				1	2	1	1	1	1	1	2	1	2	2	2	1	1	1	2	2	2	1	6	6	2
3	6	2002	1	1	1	2	4	4	7	1	5		3	2	44	11	9	1	2	1	1	1	2	1	2	1	2	2	2	1	1	1	1	6	1	2	2	6	2
3	8	2002	5	1	1	2	4	4	1				3	2	9	11		1	2	1	1	1	1	1	1	1	2	2	2	1	1	1	2	2	20	1	6	6	2
3	8	2002	4	5	2	2	4	4	5				4	1				1	1	1	1	1	1	1	2	1	2	4	14	1	1	1	1	6	1	2	4	6	1
3	8	2002	5	1	1	2	4	4	1				3	2	9	11		1	2	1	1	1	1	1	2	1	2	2	2	1	2	2	2	2	15	3	6	2	2
2	12	1998	5	1	1	2	36	3	2				4	1				2	1	1	1	2	1	1	1	2	2	1	15	2	1	1	2	3	19	2	1	6	1
4	14	2008	2	2	2	2	37	5	1				4	1				1	1	1	1	1	1	2	1	1	2	1	16	1	1	1	1	6	1	2	1	6	2
4	14	2008	2	2	1	1	1	1	2				4	1				1	15	1	1	1	1	2	1	1	2	2	17	1	1	1	1	6	1	2	2	6	1
2	13	2008	1	2	1	1	1	1	1				4	1				1	2	1	2	2	1	2	1	1	2	2	2	2	2	2	2	3	16	2	2	6	2
3	9	2008	5	1	2	1	1	1	1				4	1				1	14	1	2	1	1	1	2	1	2	2	2	1	1	1	2	4	17	1	6	6	2
2	13	2008	4	2	2	1	1	1	7	1	2		1	1				1	3	1	2	2	1	2	1	1	2	2	2	1	1	1	1	6	1	2	2	6	2
1	1	2008	2	2	1	1	1	1	2				4	1				2	16	2	2	2	1	1	1	1	2	2	2	1	1	1	1	6	1	2	2	6	1
4	14	2008	1	1	1	2	38	5	2				3	48				1	15	1	2	1	1	2	1	1	2	2	2	1	1	1	1	6	1	2	2	6	1
2	10	2008	3	2	1	1	1	1	7	1	2	3	2	1				2	2	2	2	2	1	1	1	2	2	1	17	1	1	1	2	1	18	1	6	6	1
2	10	2008	1	1	1	2	39	3	4				1	49				1	3	1	2	1	1	1	1	1	2	2	18	1	1	1	1	6	1	1	6	6	1
1	1	2008	5	5	2	1	1	1	1				4	1				1	1	1	2	1	1	1	1	1	1	6	1	1	1	1	1	6	1	1	6	6	1
1	5	2007	5	2	1	2	40	2	7	1	2	4	1	50				1	3	1	1	1	1	1	1	1	2	2	2	1	1	1	1	6	1	2	2	6	1
3	9	2007	1	1	1	2	41	3	3				2	1				1	2	1	2	1	1	1	1	2	2	1	17	2	1	1	2	1	18	1	6	6	2
3	8	2007	5	1	1	1	1	1	3				3	2	11	51	52	1	1	1	2	1	1	1	1	1	2	2	2	1	1	1	1	6	1	2	2	6	1
1	3	2007	2	2	2	1	1	1	7	1	2		4	1				2	17	1	2	2	1	1	1	1	2	2	2	1	1	1	1	6	1	2	2	6	1
2	12	2007	5	2	1	1	1	1	2				4	1				2	3	1	2	2	1	1	1	1	2	2	18	1	1	1	1	6	1	2	2	6	1
1	1	2007	2	2	1	2	42	2	1				2	1				2	3	2	1	1	1	2	1	1	2	1	19	2	1	1	2	3	19	2	1	6	1
4	16	2007	4	2	1	2	43	1	1				3	53				2	2	2	1	1	1	2	1	2	2	1	19	2	1	1	2	1	18	1	6	6	1
4	14	2007	2	2	1	1	1	1	2				4	1				2	18	1	2	2	1	1	1	1	2	2	2	1	1	1	1	6	1	1	6	6	1
2	10	2007	4	2	2	2	44	3	7	1	3		2	1				1	3	1	2	2	1	2	1	2	2	1	19	2	1	1	2	2	23	1	6	6	1
3	6	2007	4	3	3	2	43	4	1				3	54				2	3	1	1	1	1	1	1	1	2	2	2	2	1	1	2	1	18	1	6	6	2
3	9	2007	1	1	1	2	43	4	7	1	3		4	1				1	2	1	2	1	1	1	1	1	2	1	19	2	1	1	2	1	24	3	6	1	2
2	11	2007	1	2	2	2	45	3	13				2	1				2	2	2	2	2	1	2	1	1	2	2	2	1	1	1	2	2	25	1	6	6	2
2	12	2007	5	2	1	1	1	1	7	1	2		4	1				2	16	2	2	2	1	1	1	1	2	2	2	1	1	1	1	6	1	2	2	6	1
3	6	2007	3	2	1	1	1	1	3				4	1				1	1	1	2	1	1	1	1	1	2	2	20	1	1	1	2	2	23	3	6	2	2
2	13	2007	5	2	1	1	1	1	3				4	1				1	1	1	2	2	1	1	1	1	2	2	20	2	1	1	1	6	1	1	6	6	2
3	9	2006	5	2	2	2	46	6	6				4	1				2	1	2	1	1	1	2	1	1	1	6	1	1	1	1	1	6	1	1	6	6	2
3	8	2006	5	1	1	1	1	1	3				1	11				1	2	1	2	1	1	2	1	1	2	2	21	1	1	1	2	4	26	1	6	6	2
4	16	2006	4	2	2	2	47	5	1				4	1				1	1	1	2	1	1	1	1	1	2	2	2	1	1	1	2	2	20	2	2	6	2
